# 1 **HydDB: A web tool for hydrogenase**

## 2 **classification and analysis**

3 **Dan Søndergaard<sup>a</sup>, Christian N. S. Pedersen<sup>a</sup>, Chris Greening<sup>b, c\*</sup>**

4

5 <sup>a</sup> Aarhus University, Bioinformatics Research Centre, C.F. Møllers Allé 8, Aarhus  
6 DK-8000, Denmark

7 <sup>b</sup> The Commonwealth Scientific and Industrial Research Organisation, Land and  
8 Water Flagship, Clunies Ross Street, Acton, ACT 2060, Australia

9 <sup>c</sup> Monash University, School of Biological Sciences, Clayton, VIC 2800, Australia

10

### 11 **Correspondence:**

12 Dr Chris Greening ([chris.greening@monash.edu](mailto:chris.greening@monash.edu)), Monash University, School of  
13 Biological Sciences, Clayton, VIC 2800, Australia

14 Dan Søndergaard ([das@birc.au.dk](mailto:das@birc.au.dk)), Aarhus University, Bioinformatics Research  
15 Centre, C.F. Møllers Allé 8, Aarhus DK-8000, Denmark

## 16 **Abstract**

17 H<sub>2</sub> metabolism is proposed to be the most ancient and diverse mechanism of  
18 energy-conservation. The metalloenzymes mediating this metabolism,  
19 hydrogenases, are encoded by over 60 microbial phyla and are present in all major  
20 ecosystems. We developed a classification system and web tool, HydDB, for the  
21 structural and functional analysis of these enzymes. We show that hydrogenase  
22 function can be predicted by primary sequence alone using an expanded  
23 classification scheme (comprising 29 [NiFe], 8 [FeFe], and 1 [Fe] hydrogenase  
24 classes) that defines 11 new classes with distinct biological functions. Using this  
25 scheme, we built a web tool that rapidly and reliably classifies hydrogenase primary  
26 sequences using a combination of *k*-nearest neighbors' algorithms and CDD  
27 referencing. Demonstrating its capacity, the tool reliably predicted hydrogenase  
28 content and function in 12 newly-sequenced bacteria, archaea, and eukaryotes.  
29 HydDB provides the capacity to browse the amino acid sequences of 3248  
30 annotated hydrogenase catalytic subunits and also contains a detailed repository of  
31 physiological, biochemical, and structural information about the 38 hydrogenase  
32 classes defined here. The database and classifier are freely and publicly available at  
33 <http://services.birc.au.dk/hyddb/>

34

## 35 **Introduction**

36 Microorganisms conserve energy by metabolizing H<sub>2</sub>. Oxidation of this high-energy  
37 fuel yields electrons that can be used for respiration and carbon-fixation. This  
38 diffusible gas is also produced in diverse fermentation and anaerobic respiratory  
39 processes <sup>1</sup>. H<sub>2</sub> metabolism contributes to the growth and survival of microorganisms

40 across the three domains of life: chemotrophs and phototrophs, lithotrophs and  
41 heterotrophs, aerobes and anaerobes, mesophiles and extremophiles alike <sup>1,2</sup>. On  
42 the ecosystem scale, H<sub>2</sub> supports microbial communities in most terrestrial, aquatic,  
43 and host-associated ecosystems <sup>1,3</sup>. It is also proposed that H<sub>2</sub> was the primordial  
44 electron donor <sup>4,5</sup>. In biological systems, metalloenzymes known as hydrogenases  
45 are responsible for oxidizing and evolving H<sub>2</sub> <sup>1,6</sup>. Our recent survey showed there is a  
46 far greater number and diversity of hydrogenases than previously thought <sup>2</sup>. It is  
47 predicted that over 55 microbial phyla and over a third of all microorganisms harbor  
48 hydrogenases <sup>2,7</sup>. Better understanding H<sub>2</sub> metabolism and the enzymes that  
49 mediate it also has wider implications, particularly in relation to human health and  
50 disease <sup>3,8</sup>, biogeochemical cycling <sup>9</sup>, and renewable energy <sup>10,11</sup>.

51  
52 There are three types of hydrogenase, the [NiFe], [FeFe], and [Fe] hydrogenases,  
53 that are distinguished by their metal composition. Whereas the [Fe]-hydrogenases  
54 are a small methanogenic-specific family <sup>12</sup>, the [NiFe] and [FeFe] classes are widely  
55 distributed and functionally diverse. They can be classified through a hierarchical  
56 system into different groups and subgroups/subtypes with distinct biochemical  
57 features (e.g. directionality, affinity, redox partners, and localization) and  
58 physiological roles (i.e. respiration, fermentation, bifurcation, sensing) <sup>1,6</sup>. It is  
59 necessary to define the subgroup or subtype of the hydrogenase to predict  
60 hydrogenase function. For example, while Group 2a and 2b [NiFe]-hydrogenases  
61 share > 35% sequence identity, they have distinct roles as respiratory uptake  
62 hydrogenases and H<sub>2</sub> sensors respectively <sup>13,14</sup>. Likewise, discrimination between  
63 Group A1 and Group A3 [FeFe]-hydrogenases is necessary to distinguish  
64 fermentative and bifurcating enzymes <sup>2,15</sup>. Building on previous work <sup>16,17</sup>, we

65 recently created a comprehensive hydrogenase classification scheme predictive of  
66 biological function <sup>2</sup>. This scheme was primarily based on the topology of  
67 phylogenetic trees built from the amino acid sequences of hydrogenase catalytic  
68 subunits/domains. It also factored in genetic organization, metal-binding motifs, and  
69 functional information. This analysis identified 22 subgroups (within four groups) of  
70 [NiFe]-hydrogenases and six subtypes (within three groups) of [FeFe]-hydrogenases,  
71 each proposed to have unique physiological roles and contexts <sup>2</sup>.

72

73 In this work, we build on these findings to develop the first web database for the  
74 classification and analysis of hydrogenases. We developed an expanded  
75 classification scheme that captures the full sequence diversity of hydrogenase  
76 enzymes and predicts their biological function. Using this information, we developed  
77 a classification tool based on the *k*-nearest neighbors' (*k*-NN) method. HydDB is a  
78 user-friendly, high-throughput, and functionally-predictive tool for hydrogenase  
79 classification that operates with precision exceeding 99.8%.

80

## 81 **Results and Discussion**

### 82 **A sequence-based classification scheme for hydrogenases**

83 We initially developed a classification scheme to enable prediction of hydrogenase  
84 function by primary sequence alone. To do this, we visualized the relationships  
85 between all hydrogenases in sequence similarity networks (SSN) <sup>18</sup>, in which nodes  
86 represent individual proteins and the distances between them reflect BLAST *E*-  
87 values. As reflected by our analysis of other protein superfamilies <sup>19,20</sup>, SSNs allow  
88 robust inference of sequence-structure-function relationships for large datasets  
89 without the problems associated with phylogenetic trees (e.g. long-branch attraction).

90 Consistent with previous phylogenetic analyses <sup>2,16,17</sup>, this analysis showed the  
91 hydrogenase sequences clustered into eight major groups (Groups 1 to 4 [NiFe]-  
92 hydrogenases, Groups A to C [FeFe]-hydrogenases, [Fe]-hydrogenases), six of  
93 which separate into multiple functionally-distinct subgroups or subtypes at narrower  
94 logE filters (**Figure 1**; **Figure S1**). The SSNs demonstrated that all [NiFe]-  
95 hydrogenase subgroups defined through phylogenetic trees in our previous work <sup>2</sup>  
96 separated into distinct clusters, which is consistent with our evolutionary model that  
97 such hydrogenases diverged from a common ancestor to adopt multiple distinct  
98 functions <sup>2</sup>. The only exception were the Group A [FeFe]-hydrogenases, which as  
99 previously-reported <sup>2,17</sup>, cannot be classified by sequence alone as they have  
100 principally diversified through changes in domain architecture and quaternary  
101 structure. It remains necessary to analyze the organization of the genes encoding  
102 these enzymes to determine their specific function, e.g. whether they serve  
103 fermentative or electron-bifurcating roles.

104

105 The SSN analysis revealed that several branches that clustered together on the  
106 phylogenetic tree analysis <sup>2</sup> in fact separate into several well-resolved subclades  
107 (**Figure 1**). We determined whether this was significant by analyzing the taxonomic  
108 distribution, genetic organization, metal-binding sites, and reported biochemical or  
109 functional characteristics of the differentiated subclades. On this basis, we concluded  
110 that 11 of the new subclades identified are likely to have unique physiological roles.  
111 We therefore refine and expand the hydrogenase classification to reflect the  
112 hydrogenases are more diverse in both primary sequence and predicted function  
113 than accounted for by even the latest classification scheme <sup>2</sup>. The new scheme

114 comprises 38 hydrogenase classes, namely 29 [NiFe]-hydrogenase subclasses, 8  
115 [FeFe]-hydrogenase subtypes, and the monophyletic [Fe]-hydrogenases (**Table 1**).  
116  
117 Three lineages originally classified as Group 1a [NiFe]-hydrogenases were  
118 reclassified as new subgroups, namely those affiliated with Coriobacteria (Group 1i),  
119 Archaeoglobi (Group 1j), and Methanosarcinales (Group 1i). Cellular and molecular  
120 studies show these enzymes all support anaerobic respiration of H<sub>2</sub>, but differ in the  
121 membrane carriers (methanophenazine, menaquinone) and terminal electron  
122 acceptors (heterodisulfide, sulfate, nitrate) that they couple to<sup>21,22</sup>. The previously-  
123 proposed 4b and 4d subgroups<sup>2</sup> were dissolved, as the SSN analysis confirmed  
124 they were highly polyphyletic. These sequences are reclassified here into five new  
125 subgroups: the formate- and carbon monoxide-respiring Mrp-linked complexes  
126 (Group 4b)<sup>23</sup>, the ferredoxin-coupled Mrp-linked complexes (Group 4d)<sup>24</sup>, the well-  
127 described methanogenic Eha (Group 4h) and Ehb (Group 4i) supercomplexes<sup>25</sup>,  
128 and a more loosely clustered class of unknown function (Group 4g). Enzymes within  
129 these subgroups, with the exception of the uncharacterized 4g enzymes, sustain  
130 well-described specialist functions in the energetics of various archaea<sup>23-25</sup>. Three  
131 crenarchaeotal hydrogenases were also classified as their own family (Group 2e);  
132 these enzymes enable certain crenarchaeotes to grow aerobically on O<sub>2</sub><sup>26,27</sup> and  
133 hence may represent a unique lineage of aerobic uptake hydrogenases currently  
134 underrepresented in genome databases. The Group C [FeFe]-hydrogenases were  
135 also separated into three main subtypes given they separate into distinct clusters  
136 even at relatively broad log*E* values (**Figure 1**); these subtypes are each transcribed  
137 with different regulatory elements and are likely to have distinct regulatory roles<sup>2,17,28</sup>  
138 (**Table 1**).

139

140 **HydDB reliably predicts hydrogenase class using the *k*-NN method and CDD**  
141 **referencing**

142 Using this information, we built a web tool to classify hydrogenases. Hydrogenase  
143 classification is determined through a three-step process following input of the  
144 catalytic subunit sequence. Two checks are initially performed to confirm if the  
145 inputted sequence is likely to encode a hydrogenase catalytic subunit/domain. The  
146 Conserved Domain Database (CDD) <sup>29</sup> is referenced to confirm that the inputted  
147 sequence has a hydrogenase catalytic domain, i.e. “Complex1\_49kDa superfamily”  
148 (cl21493) (for NiFe-hydrogenases), “Fe\_hyd\_lg\_C superfamily” (cl14953) (for FeFe-  
149 hydrogenases), and “HMD” (pfam03201) (for Fe-hydrogenases). A homology check  
150 is also performed that computes the BLAST *E*-value between the inputted sequence  
151 and its closest homolog in HydDB. HydDB classifies any inputted sequence that  
152 lacks hydrogenase conserved domains or has low homology scores (*E*-value > 10<sup>-5</sup>)  
153 as a non-hydrogenase (**Table S1**).

154

155 In the final step, the sequence is classified through the *k*-NN method that determines  
156 the most similar sequences listed in the HydDB reference database. To determine  
157 the optimal *k* for the dataset, we performed a 5-fold cross-validation for *k* = 1...10  
158 and computed the precision for each *k*. The results are shown in **Figure 2**. The  
159 classifier predicted the classes of the 3248 hydrogenase sequences with 99.8%  
160 precision and high robustness when performing a 5-fold cross-validation (as  
161 described in the Methods section) for *k* = 4. The six sequences where there were  
162 discrepancies between the SSN and *k*-NN predictions are shown in **Table S2**. The  
163 classifier has also been trained to detect and exclude protein families that are

164 homologous to hydrogenases but do not metabolize H<sub>2</sub> (Nuo, Ehr, NARF, HmdII<sup>1,2</sup>)  
165 using reference sequences of these proteins (**Table S1**).

166

167 Sequences of the [FeFe] Group A can be classified into functionally-distinct subtypes  
168 (A1, A2, A3, A4) based on genetic organization<sup>2</sup>. The classifier can classify such  
169 hydrogenases if the protein sequence immediately downstream from the catalytic  
170 subunit sequence is provided. The classifier references the CDD to search for  
171 conserved domains in the downstream protein sequence. A sequence is classified  
172 as [FeFe] Group A2 if one of the domains “GltA”, “GltD”, “glutamate synthase small  
173 subunit” or “putative oxidoreductase”, but not “NuoF”, is found in the sequence.

174 Sequences are classified as [FeFe] Group A3 if the domain “NuoF” is found and  
175 [FeFe] Group A4 if the domain “HycB” is present. If none of the domains are found,  
176 the sequence is classified as A1. These classification rules were determined by  
177 collecting 69 downstream protein sequences. The sequences were then submitted to  
178 the CDD and the domains which most often occurred in each subtype were  
179 extracted.

180

181 In addition to its precision, the classifier is superior to other approaches due to its  
182 usability. It is accessible as a free web service at <http://services.birc.au.dk/hyddb/>  
183 HydDB allows the users to paste or upload sequences of hydrogenase catalytic  
184 subunit sequences in FASTA format and run the classification (**Figure S2**). When  
185 analysis has completed, results are presented in a table that can be downloaded as  
186 a CSV file (**Figure S3**). This provides an efficient and user-friendly way to classify  
187 hydrogenases, in contrast to the previous standard which requires visualization of  
188 phylogenetic trees derived from multiple sequence alignments<sup>30</sup>.



189

## 190 **HydDB infers the physiological roles of H<sub>2</sub> metabolism**

191 As summarized in **Table 1**, hydrogenase class is strongly correlated with  
192 physiological role. As a result, the classifier is capable of predicting both the class  
193 and function of a sequenced hydrogenase. To demonstrate this capacity, we used  
194 HydDB to analyze the hydrogenases present in 12 newly-sequenced bacteria,  
195 archaea, and eukaryotes of major ecological significance. The classifier correctly  
196 classified all 24 hydrogenases identified in the sequenced genomes, as validated  
197 with SSNs (**Table 2**). On the basis of these classifications, the physiological roles of  
198 H<sub>2</sub> metabolism were predicted (**Table 2**). For five of the organisms, these predictions  
199 are confirmed or supported by previously published data <sup>27,31–34</sup>. Other predictions  
200 are in line with metabolic models derived from metagenome surveying <sup>35–37</sup>. In some  
201 cases, the capacity for organisms to metabolize H<sub>2</sub> was not tested or inferred in  
202 previous studies despite the presence of hydrogenases in the sequenced genomes  
203 <sup>32,38–40</sup>.

204

205 While HydDB serves as a reliable initial predictor of hydrogenase class and function,  
206 further analysis is recommended to verify predictions. Hydrogenase sequences only  
207 provide organisms with the genetic capacity to metabolise H<sub>2</sub>; their function is  
208 ultimately modulated by their expression and integration within the cell <sup>1,41</sup>. In  
209 addition, some classifications are likely to be overgeneralized due to lack of  
210 functional and biochemical characterization of certain lineages and sublineages. For  
211 example, it is not clear if two distant members of the Group 1h [NiFe]-hydrogenases  
212 (*Robiginitalea biformata*, *Sulfolobus islandicus*) perform the same H<sub>2</sub>-scavenging  
213 functions as the core group <sup>9</sup>. Likewise, it seems probable that the Group 3a [NiFe]-

214 hydrogenases of Thermococci and Aquificae use a distinct electron donor to the  
215 main class<sup>42</sup>. Prominent cautions are included in the enzyme pages in cases such  
216 as these. HydDB will be updated when literature is published that influences  
217 functional assignments.

218

### 219 **HydDB contains interfaces for hydrogenase browsing and analyzing**

220 In addition to its classification function, HydDB is designed to be a definitive  
221 repository for hydrogenase retrieval and analysis. The database presently contains  
222 entries for 3248 hydrogenases, including their NCBI accession numbers, amino acid  
223 sequences, hydrogenase classes, taxonomic affiliations, and predicted behavior  
224 **(Figure S4)**. To enable easy exploration of the data set, the database also provides  
225 access to an interface for searching, filtering, and sorting the data, as well as the  
226 capacity to download the results in CSV or FASTA format. There are individual  
227 pages for the 38 hydrogenase classes defined here **(Table 1)**, including descriptions  
228 of their physiological role, genetic organization, taxonomic distribution, and  
229 biochemical features. This is supplemented with a compendium of structural  
230 information about the hydrogenases, which is integrated with the Protein Databank  
231 (PDB), as well as a library of over 500 literature references **(Figure S5)**.

232

## 233 **Conclusions**

234 To summarize, HydDB is a definitive resource for hydrogenase classification and  
235 analysis. The classifier described here provides a reliable, efficient, and convenient  
236 tool for hydrogenase classification and functional prediction. HydDB also provides  
237 browsing tools for the rapid analysis and retrieval of hydrogenase sequences.

238 Finally, the manually-curated repository of class descriptions, hydrogenase

239 structures, and literature references provides a deep but accessible resource for  
240 understanding hydrogenases.

241

## 242 **Methods**

### 243 **Sequence datasets**

244 The database was constructed using the amino acid sequences of all curated non-  
245 redundant 3248 hydrogenase catalytic subunits represented in the NCBI RefSeq  
246 database in August 2014 <sup>2</sup> (**Dataset S1**). In order to test the classification tool,  
247 additional sequences from newly-sequenced archaeal and bacterial phyla were  
248 retrieved from the Joint Genome Institute's Integrated Microbial Genomes database  
249 <sup>43</sup>.

250

### 251 **Sequence similarity networks**

252 Sequence similarity networks (SSNs) <sup>18</sup> constructed using Cytoscape 4.1 <sup>44</sup> were  
253 used to visualize the distribution and diversity of the retrieved hydrogenase  
254 sequences. In this analysis, each node represents one of the 3248 hydrogenase  
255 sequences in the reference database (**Dataset S1**). Each edge represents the  
256 sequence similarity between them as determined by *E*-values from all-vs-all BLAST  
257 analysis, with all self and duplicate edges removed. Three networks were  
258 constructed, namely for the [NiFe]-hydrogenase large subunit sequences (**Dataset**  
259 **S2**), [FeFe]-hydrogenase catalytic domain sequences (**Dataset S3**), and [Fe]-  
260 hydrogenase sequences (**Dataset S4**). To control the degree of separation between  
261 nodes,  $\log E$  cutoffs that were incrementally decreased from -5 to -200 until no major  
262 changes in clustering was observed. The  $\log E$  cutoffs used for the final  
263 classifications are shown in **Figure 1** and **Figure S1**.

264

## 265 **Classification method**

266 The  $k$ -NN method is a well-known machine learning method for classification <sup>45</sup>.

267 Given a set of data points  $x_1, x_2, \dots, x_N$  (e.g. sequences) with known labels  $y_1, y_2, \dots, y_N$

268 (e.g. type annotations), the label of a point,  $x$ , is predicted by computing the distance

269 from  $x$  to  $x_1, x_2, \dots, x_N$  and extracting the  $k$  labeled points closest to  $x$ , i.e. the

270 neighbors. The predicted label is then determined by majority vote of the labels of

271 the neighbors. The distance measure applied here is that of a BLAST search. Thus,

272 the classifier corresponds to a homology search where the types of the top  $k$  results

273 are considered. However, formulating the classification method as a machine

274 learning problem allows the use of common evaluation methods to estimate the

275 precision of the method and perform model selection. The classifier was evaluated

276 using  $k$ -fold cross-validation. The dataset is first split in to  $k$  parts of equal size.  $k - 1$

277 parts (the *training set*) are then used for training the classifier and the labels of the

278 data points in the remaining part (the *test set*) are then predicted. This process,

279 called a *fold*, is repeated  $k$  times. The predicted labels of each fold are then

280 compared to the known labels and a precision can be computed.

281

## 282 **Acknowledgements**

283 We thank A/Prof Colin J. Jackson, Dr Hafna Ahmed, Dr Andrew Warden, Dr Stephen

284 Pearce, and the two anonymous reviewers for their helpful advice and comments

285 regarding this manuscript. This work was supported by a PUMPkin Centre of

286 Excellence PhD Scholarship awarded to DS and a CSIRO Office of the Chief

287 Executive Postdoctoral Fellowship awarded to CG.

288

## 289 Author Contributions

290 CG and DS designed experiments. DS and CG performed experiments. CG, DS,  
291 and CNSP analyzed data. CNSP supervised students. CG and DS wrote the paper.

292

## 293 Competing financial interests

294 The authors declare no competing financial interests.

295

## 296 References

- 297 1. Schwartz, E., Fritsch, J. & Friedrich, B. *H<sub>2</sub>-metabolizing prokaryotes*. (Springer Berlin  
298 Heidelberg, 2013).
- 299 2. Greening, C. *et al.* Genome and metagenome surveys of hydrogenase diversity indicate H<sub>2</sub> is  
300 a widely-utilised energy source for microbial growth and survival. *ISME J.* **10**, 761–777 (2016).
- 301 3. Cook, G. M., Greening, C., Hards, K. & Berney, M. in *Advances in Bacterial Pathogen Biology*  
302 (ed. Poole, R. K.) **65**, 1–62 (Academic Press, 2014).
- 303 4. Lane, N., Allen, J. F. & Martin, W. How did LUCA make a living? Chemiosmosis in the origin of  
304 life. *BioEssays* **32**, 271–280 (2010).
- 305 5. Weiss, M. C. *et al.* The physiology and habitat of the last universal common ancestor. *Nat.*  
306 *Microbiol.* **1**, 16116 (2016).
- 307 6. Lubitz, W., Ogata, H., Rüdiger, O. & Reijerse, E. Hydrogenases. *Chem. Rev.* **114**, 4081–148  
308 (2014).
- 309 7. Peters, J. W. *et al.* [FeFe]- and [NiFe]-hydrogenase diversity, mechanism, and maturation.  
310 *Biochim. Biophys. Acta - Mol. Cell Res.* (2014). doi:10.1016/j.bbamcr.2014.11.021
- 311 8. Carbonero, F., Benefiel, A. C. & Gaskins, H. R. Contributions of the microbial hydrogen  
312 economy to colonic homeostasis. *Nat Rev Gastroenterol Hepatol* **9**, 504–518 (2012).
- 313 9. Greening, C. *et al.* Atmospheric hydrogen scavenging: from enzymes to ecosystems. *Appl.*

- 314 *Environ. Microbiol.* **81**, 1190–1199 (2015).
- 315 10. Levin, D. B., Pitt, L. & Love, M. Biohydrogen production: prospects and limitations to practical  
316 application. *Int. J. Hydrogen Energy* **29**, 173–185 (2004).
- 317 11. Cracknell, J. A., Vincent, K. A. & Armstrong, F. A. Enzymes as working or inspirational  
318 catalysts for fuel cells and electrolysis. *Chem. Rev.* **108**, 2439–2461 (2008).
- 319 12. Shima, S. *et al.* The crystal structure of [Fe]-Hydrogenase reveals the geometry of the active  
320 site. *Science* **321**, 572–575 (2008).
- 321 13. Lenz, O. & Friedrich, B. A novel multicomponent regulatory system mediates H<sub>2</sub> sensing in  
322 *Alcaligenes eutrophus*. *Proc. Natl. Acad. Sci. U. S. A.* **95**, 12474–12479 (1998).
- 323 14. Greening, C., Berney, M., Hards, K., Cook, G. M. & Conrad, R. A soil actinobacterium  
324 scavenges atmospheric H<sub>2</sub> using two membrane-associated, oxygen-dependent [NiFe]  
325 hydrogenases. *Proc. Natl. Acad. Sci. U. S. A.* **111**, 4257–4261 (2014).
- 326 15. Schuchmann, K. & Müller, V. A bacterial electron-bifurcating hydrogenase. *J. Biol. Chem.* **287**,  
327 31165–31171 (2012).
- 328 16. Vignais, P. M., Billoud, B. & Meyer, J. Classification and phylogeny of hydrogenases. *FEMS*  
329 *Microbiol. Rev.* **25**, 455–501 (2001).
- 330 17. Calusinska, M., Happe, T., Joris, B. & Wilmotte, A. The surprising diversity of clostridial  
331 hydrogenases: a comparative genomic perspective. *Microbiology* **156**, 1575–1588 (2010).
- 332 18. Atkinson, H. J., Morris, J. H., Ferrin, T. E. & Babbitt, P. C. Using sequence similarity networks  
333 for visualization of relationships across diverse protein superfamilies. *PLoS One* **4**, e4345  
334 (2009).
- 335 19. Ahmed, F. H. *et al.* Sequence-structure-function classification of a catalytically diverse  
336 oxidoreductase superfamily in mycobacteria. *J. Mol. Biol.* **427**, 3554–3571 (2015).
- 337 20. Ney, B. *et al.* The methanogenic redox cofactor F<sub>420</sub> is widely synthesized by aerobic soil  
338 bacteria. *ISME J.* In press (2016).
- 339 21. Stetter, K. O. *Archaeoglobus fulgidus* gen. nov., sp. nov.: a new taxon of extremely  
340 thermophilic archaeobacteria. *Syst. Appl. Microbiol.* **10**, 172–173 (1988).

- 341 22. Deppenmeier, U. & Blaut, M. Analysis of the *vhoGAC* and *vhtGAC* operons from  
342 *Methanosarcina mazei* strain Gö1, both encoding a membrane-bound hydrogenase and a  
343 cytochrome *b*. *Eur. J. Biochem.* **269**, 261–269 (1995).
- 344 23. Kim, Y. J. *et al.* Formate-driven growth coupled with H<sub>2</sub> production. *Nature* **467**, 352–5 (2010).
- 345 24. McTernan, P. M. *et al.* Intact functional fourteen-subunit respiratory membrane-bound [NiFe]-  
346 hydrogenase complex of the hyperthermophilic archaeon *Pyrococcus furiosus*. *J. Biol. Chem.*  
347 **289**, 19364–19372 (2014).
- 348 25. Lie, T. J. *et al.* Essential anaplerotic role for the energy-converting hydrogenase Eha in  
349 hydrogenotrophic methanogenesis. *Proc. Natl. Acad. Sci. U. S. A.* **109**, 15473–8 (2012).
- 350 26. Auernik, K. S. & Kelly, R. M. Physiological versatility of the extremely thermoacidophilic  
351 archaeon *Metallosphaera sedula* supported by transcriptomic analysis of heterotrophic,  
352 autotrophic, and mixotrophic growth. *Appl. Environ. Microbiol.* **76**, 931–935 (2010).
- 353 27. Giaveno, M. A., Urbietta, M. S., Ulloa, J. R., González Toril, E. & Donati, E. R. Physiologic  
354 versatility and growth flexibility as the Main characteristics of a novel thermoacidophilic  
355 *Acidianus* strain isolated from Copahue geothermal area in Argentina. *Microb. Ecol.* **65**, 336–  
356 346 (2012).
- 357 28. Poudel, S. *et al.* Unification of [FeFe]-hydrogenases into three structural and functional groups.  
358 *Biochim. Biophys. Acta (BBA)-General Subj.* doi:10.1016/j.bbagen.2016.05.034 (2016).
- 359 29. Marchler-Bauer, A. & Bryant, S. H. CD-Search: protein domain annotations on the fly. *Nucleic*  
360 *Acids Res.* **32**, W327–31 (2004).
- 361 30. Berney, M., Greening, C., Hards, K., Collins, D. & Cook, G. M. Three different [NiFe]  
362 hydrogenases confer metabolic flexibility in the obligate aerobe *Mycobacterium smegmatis*.  
363 *Environ. Microbiol.* **16**, 318–330 (2014).
- 364 31. Greening, C. *et al.* Persistence of the dominant soil phylum *Acidobacteria* by trace gas  
365 scavenging. *Proc. Natl. Acad. Sci.* **112**, 10497–10502 (2015).
- 366 32. Chen, Z. *et al.* *Phaeodactylibacter xiamenensis* gen. nov., sp. nov., a member of the family  
367 *Saprospiraceae* isolated from the marine alga *Phaeodactylum tricornutum*. *Int. J. Syst. Evol.*

- 368            *Microbiol.* **64**, 3496–3502 (2014).
- 369    33.    Koch, H. *et al.* Growth of nitrite-oxidizing bacteria by aerobic hydrogen oxidation. *Science* **345**,  
370            1052–1054 (2014).
- 371    34.    Carere, C. R. *et al.* Growth and persistence of methanotrophic bacteria by aerobic hydrogen  
372            respiration. *Proc. Natl. Acad. Sci. U. S. A.* (2016).
- 373    35.    Haroon, M. F. *et al.* Anaerobic oxidation of methane coupled to nitrate reduction in a novel  
374            archaeal lineage. *Nature* **500**, 567–70 (2013).
- 375    36.    Evans, P. N. *et al.* Methane metabolism in the archaeal phylum *Bathyarchaeota* revealed by  
376            genome-centric metagenomics. *Science* **350**, 434–438 (2015).
- 377    37.    Brown, C. T. *et al.* Unusual biology across a group comprising more than 15% of domain  
378            *Bacteria*. *Nature* **523**, 208–211 (2015).
- 379    38.    Spang, A. *et al.* Complex archaea that bridge the gap between prokaryotes and eukaryotes.  
380            *Nature* **521**, 173–179 (2015).
- 381    39.    Eloe-Fadrosh, E. A. *et al.* Global metagenomic survey reveals a new bacterial candidate  
382            phylum in geothermal springs. *Nat Commun* **7**, (2016).
- 383    40.    Wilson, M. C. *et al.* An environmental bacterial taxon with a large and distinct metabolic  
384            repertoire. *Nature* **506**, 58–62 (2014).
- 385    41.    Greening, C. & Cook, G. M. Integration of hydrogenase expression and hydrogen sensing in  
386            bacterial cell physiology. *Curr. Opin. Microbiol.* **18**, 30–8 (2014).
- 387    42.    Greening, C. *et al.* Physiology, biochemistry, and applications of F<sub>420</sub>- and F<sub>o</sub>-dependent redox  
388            reactions. *Microbiol. Mol. Biol. Rev.* **80**, 451–493 (2016).
- 389    43.    Markowitz, V. M. *et al.* IMG: the integrated microbial genomes database and comparative  
390            analysis system. *Nucleic Acids Research* **40**, D115–22 (2012).
- 391    44.    Shannon, P. *et al.* Cytoscape: a software environment for integrated models of biomolecular  
392            interaction networks. *Genome Res.* **13**, 2498–2504 (2003).
- 393    45.    Cover, T. & Hart, P. Nearest neighbor pattern classification. *IEEE Trans. Inf. Theory* **13**,



394 (1967).

395 46. Constant, P., Chowdhury, S. P., Pratscher, J. & Conrad, R. Streptomyces contributing to  
396 atmospheric molecular hydrogen soil uptake are widespread and encode a putative high-  
397 affinity [NiFe]-hydrogenase. *Environ. Microbiol.* **12**, 821–829 (2010).

398 47. Hamann, E. *et al.* Environmental *Breviatea* harbour mutualistic *Arcobacter* epibionts. *Nature*  
399 **534**, 254–258 (2016).

400 48. Sousa, F. L., Neukirchen, S., Allen, J. F., Lane, N. & Martin, W. F. Lokiarchaeon is hydrogen  
401 dependent. *Nat. Microbiol.* **1**, 16034 (2016).

402

## 403 **Figure Legends**

404 **Figure 1.** Sequence similarity network of hydrogenase sequences. Nodes represent  
405 individual proteins and the edges show the BLAST  $E$ -values between them at the  
406  $\log E$  filter defined at the bottom-left of each panel. The sequences are colored by  
407 class as defined in the legends. **Figure S1** shows the further delineation of the  
408 encircled [NiFe] hydrogenase classes.

409

410 **Figure 2.** Evaluating the  $k$ -NN classifier for  $k = 1 \dots 10$ . For each  $k$ , a 5-fold cross-  
411 validation was performed. The mean precision  $\pm$  two standard deviations of the folds  
412 is shown in the figure (note the  $y$ -axis).  $k = 1$  provides the most accurate classifier.  
413 However,  $k = 4$  provides almost the same precision and is more robust to errors in  
414 the training set (reflected by the lower standard deviation). In general, the standard  
415 deviation is very small, indicating that the predictions are robust to changes in the  
416 training data.

417

## 418 **Tables**

419 **Table 1.** Expanded classification scheme for hydrogenase enzymes. The majority of  
420 the classes were defined in previous work <sup>2,16,17,46</sup>. The [NiFe] Group 1i, 1j, 1j, 2e,  
421 4d, 4g, 4h, and 4i enzymes and [FeFe] Groups C1, C2, and C3 enzymes were  
422 defined in this work based on their separation into distinct clusters in the SSN  
423 analysis (**Figure 1**). HydDB contains detailed information on each of these classes,  
424 including their taxonomic distribution, genetic organization, biochemistry, and  
425 structures, as well a list of primary references.

| <b>[NiFe] Group 1: Respiratory H<sub>2</sub>-uptake [NiFe]-hydrogenases</b>   |                                       |                                                                                                                                            |           |
|-------------------------------------------------------------------------------|---------------------------------------|--------------------------------------------------------------------------------------------------------------------------------------------|-----------|
| <b>1a</b>                                                                     | Periplasmic                           | Electron input for sulfate, metal, and organohalide respiration. [NiFeSe] variants.                                                        | 2         |
| <b>1b</b>                                                                     | Prototypical                          | Electron input for sulfate, fumarate, metal, and nitrate respiration.                                                                      | 2         |
| <b>1c</b>                                                                     | Hyb-type                              | Electron input for fumarate, nitrate, and sulfate respiration. Physiologically reversible.                                                 | 2         |
| <b>1d</b>                                                                     | Oxygen-tolerant                       | Electron input for aerobic respiration and oxygen-tolerant anaerobic respiration.                                                          | 2         |
| <b>1e</b>                                                                     | Isp-type                              | Electron input primarily for sulfur respiration. Physiologically reversible.                                                               | 2         |
| <b>1f</b>                                                                     | Oxygen-protecting                     | Unresolved role. May liberate electrons to reduce reactive oxygen species.                                                                 | 2         |
| <b>1g</b>                                                                     | Crenarchaeota-type                    | Electron input primarily for sulfur respiration.                                                                                           | 2         |
| <b>1h</b>                                                                     | Actinobacteria-type                   | Electron input for aerobic respiration. Scavenges electrons from atmospheric H <sub>2</sub> .                                              | 2,46      |
| <b>1i</b>                                                                     | Coriobacteria-type (putative)         | Undetermined role. May liberate electrons for anaerobic respiration.                                                                       | This work |
| <b>1j</b>                                                                     | Archaeoglobi-type                     | Electron input for sulfate respiration <sup>21</sup> .                                                                                     | This work |
| <b>1k</b>                                                                     | Methanophenazine-reducing             | Electron input for methanogenic heterodisulfide respiration <sup>22</sup> .                                                                | This work |
| <b>[NiFe] Group 2: Alternative and sensory uptake [NiFe]-hydrogenases</b>     |                                       |                                                                                                                                            |           |
| <b>2a</b>                                                                     | Cyanobacteria-type                    | Electron input for aerobic respiration. Recycles H <sub>2</sub> produced by other cellular processes.                                      | 16        |
| <b>2b</b>                                                                     | Histidine kinase-linked               | H <sub>2</sub> sensing. Activates two-component system controlling hydrogenase expression.                                                 | 16        |
| <b>2c</b>                                                                     | Diguanylate cyclase-linked (putative) | Undetermined role. May sense H <sub>2</sub> and regulate processes through cyclic di-GMP production.                                       | 2         |
| <b>2d</b>                                                                     | Aquificae-type                        | Unresolved role. May generate reductant for carbon fixation or have a regulatory role.                                                     | 2         |
| <b>2e</b>                                                                     | Metallosphaera-type (putative)        | Undetermined role. May liberate electrons primarily for aerobic respiration <sup>26</sup> .                                                | This work |
| <b>[NiFe] Group 3: Cofactor-coupled bidirectional [NiFe]-hydrogenases</b>     |                                       |                                                                                                                                            |           |
| <b>3a</b>                                                                     | F <sub>420</sub> -coupled             | Couples oxidation of H <sub>2</sub> to reduction of F <sub>420</sub> during methanogenesis. Physiologically reversible. [NiFeSe] variants. | 16        |
| <b>3b</b>                                                                     | NADP-coupled                          | Couples oxidation of NADPH to evolution of H <sub>2</sub> . Physiologically reversible. May have sulfhydrogenase activity.                 | 16        |
| <b>3c</b>                                                                     | Heterodisulfide reductase-linked      | Bifurcates electrons from H <sub>2</sub> to heterodisulfide and Fd <sub>ox</sub> in methanogens. [NiFeSe] variants.                        | 16        |
| <b>3d</b>                                                                     | NAD-coupled                           | Interconverts electrons between H <sub>2</sub> and NAD depending on cellular redox state.                                                  | 16        |
| <b>[NiFe] Group 4: Respiratory H<sub>2</sub>-evolving [NiFe]-hydrogenases</b> |                                       |                                                                                                                                            |           |
| <b>4a</b>                                                                     | Formate hydrogenlyase                 | Couples formate oxidation to fermentative H <sub>2</sub> evolution. May be H <sup>+</sup> -translocating.                                  | 2         |
| <b>4b</b>                                                                     | Formate-respiring                     | Respires formate or carbon monoxide using H <sup>+</sup> as electron acceptor. Na <sup>+</sup> -translocating via Mrp <sup>23</sup> .      | This work |
| <b>4c</b>                                                                     | Carbon monoxide-respiring             | Respires carbon monoxide using H <sup>+</sup> as electron acceptor. H <sup>+</sup> -translocating.                                         | 2         |

|                            |                                           |                                                                                                                                                          |           |
|----------------------------|-------------------------------------------|----------------------------------------------------------------------------------------------------------------------------------------------------------|-----------|
| <b>4d</b>                  | Ferredoxin-coupled, Mrp-linked            | Couples Fd <sub>red</sub> oxidation to H <sup>+</sup> reduction. Na <sup>+</sup> -translocating via Mrp complex <sup>24</sup> .                          | This work |
| <b>4e</b>                  | Ferredoxin-coupled, Ech-type              | Couples Fd <sub>red</sub> oxidation to H <sup>+</sup> reduction. Physiologically reversible via H <sup>+</sup> /Na <sup>+</sup> translocation.           | 2         |
| <b>4f</b>                  | Formate-coupled (putative)                | Undetermined role. May couple formate oxidation to H <sub>2</sub> evolution and H <sup>+</sup> translocation.                                            | 2         |
| <b>4g</b>                  | Ferredoxin-coupled (putative)             | Undetermined role. May couple Fd <sub>red</sub> oxidation to proton reduction and H <sup>+</sup> /Na <sup>+</sup> translocation.                         | This work |
| <b>4h</b>                  | Ferredoxin-coupled, Eha-type              | Couples Fd <sub>red</sub> oxidation to H <sup>+</sup> reduction in anaplerotic processes. H <sup>+</sup> /Na <sup>+</sup> -translocating <sup>25</sup> . | This work |
| <b>4i</b>                  | Ferredoxin-coupled, Ehb-type              | Couples Fd <sub>red</sub> oxidation to H <sup>+</sup> reduction in anabolic processes. H <sup>+</sup> /Na <sup>+</sup> -translocating <sup>25</sup> .    | This work |
| <b>[FeFe] Hydrogenases</b> |                                           |                                                                                                                                                          |           |
| <b>A1</b>                  | Prototypical                              | Couples ferredoxin oxidation to fermentative or photobiological H <sub>2</sub> evolution.                                                                | 2,17      |
| <b>A2</b>                  | Glutamate synthase-linked (putative)      | Undetermined role. May couple H <sub>2</sub> oxidation to NAD reduction, generating reductant for glutamate synthase.                                    | 2,17      |
| <b>A3</b>                  | Bifurcating                               | Reversibly bifurcates electrons from H <sub>2</sub> to NAD and Fd <sub>ox</sub> in anaerobic bacteria.                                                   | 2,17      |
| <b>A4</b>                  | Formate dehydrogenase-linked              | Couples formate oxidation to H <sub>2</sub> evolution. Some bifurcate electrons from H <sub>2</sub> to ferredoxin and NADP.                              | 2,17      |
| <b>B</b>                   | Colonic-type (putative)                   | Undetermined role. May couple Fd <sub>red</sub> oxidation to fermentative H <sub>2</sub> evolution.                                                      | 17        |
| <b>C1</b>                  | Histidine kinase-linked (putative)        | Undetermined role. May sense H <sub>2</sub> and regulate processes via histidine kinases <sup>2</sup> .                                                  | This work |
| <b>C2</b>                  | Chemotactic (putative)                    | Undetermined role. May sense H <sub>2</sub> and regulate processes via methyl-accepting chemotaxis proteins <sup>2</sup> .                               | This work |
| <b>C3</b>                  | Phosphatase-linked (putative)             | Undetermined role. May sense H <sub>2</sub> and regulate processes via serine/threonine phosphatases <sup>2</sup> .                                      | This work |
| <b>[Fe] Hydrogenases</b>   |                                           |                                                                                                                                                          |           |
| <b>All</b>                 | Methenyl-H <sub>4</sub> MPT dehydrogenase | Reversibly couples H <sub>2</sub> oxidation to 5,10-methenyltetrahydromethanopterin reduction.                                                           | 16        |

426

427 **Table 2.** Predictive capacity of the HydDB. HydDB accurately determined hydrogenase content and predicted the physiological  
428 roles of H<sub>2</sub> metabolism in 12 newly-sequenced archaeal and bacterial species.

429

430

| Organism                               | Phylum                         | Hydrogenase accession no.                                            | HydDB classification                                                     | SSN classification                                                       | Predicted H <sub>2</sub> metabolism                                                                                   | Confirmed H <sub>2</sub> metabolism                                              |
|----------------------------------------|--------------------------------|----------------------------------------------------------------------|--------------------------------------------------------------------------|--------------------------------------------------------------------------|-----------------------------------------------------------------------------------------------------------------------|----------------------------------------------------------------------------------|
| <i>Pyrinomonas methylaliphatogenes</i> | Acidobacteria                  | WP_041979300.1                                                       | [NiFe] Group 1h                                                          | [NiFe] Group 1h                                                          | Persistence by aerobic respiration of atmospheric H <sub>2</sub>                                                      | Confirmed experimentally <sup>31</sup>                                           |
| <i>Phaeodactylibacter xiamenensis</i>  | Bacteroidetes                  | WP_044227713.1<br>WP_044216927.1<br>WP_044227053.1                   | [NiFe] Group 1d<br>[NiFe] Group 2a<br>[NiFe] Group 3d                    | [NiFe] Group 1d<br>[NiFe] Group 2a<br>[NiFe] Group 3d                    | Chemolithoautotrophic growth by aerobic H <sub>2</sub> oxidation                                                      | Bacterium grows aerobically, but H <sub>2</sub> oxidation untested <sup>32</sup> |
| Bathyarchaeota archaeon BA1            | Bathyarchaeota                 | KPV62434.1<br>KPV62673.1<br>KPV62298.1                               | [NiFe] Group 3c<br>[NiFe] Group 3c<br>[NiFe] Group 4g                    | [NiFe] Group 3c<br>[NiFe] Group 3c<br>[NiFe] Group 4g                    | Couples Fd <sub>red</sub> oxidation to H <sub>2</sub> evolution in energy-conserving and bifurcating processes        | Unconfirmed but consistent with metagenome-based models <sup>36</sup>            |
| <i>Lenisia limosa</i>                  | Obozoa (Breviatea class)       | LenisMan28                                                           | [FeFe] Group A1                                                          | [FeFe] Group A                                                           | Fermentative evolution of H <sub>2</sub>                                                                              | Confirmed experimentally <sup>47</sup>                                           |
| <i>Acidianus copahuensis</i>           | Crenarchaeota                  | WP_048100721.1<br>WP_048100713.1<br>WP_048100378.1<br>WP_048100359.1 | [NiFe] Group 1g<br>[NiFe] Group 1g<br>[NiFe] Group 1h<br>[NiFe] Group 2e | [NiFe] Group 1g<br>[NiFe] Group 1g<br>[NiFe] Group 1h<br>[NiFe] Group 2e | Chemolithoautotrophic growth by H <sub>2</sub> oxidation using O <sub>2</sub> or S <sub>0</sub> as electron acceptors | Partially confirmed experimentally <sup>27</sup>                                 |
| <i>Arcobacter</i> sp. E1/2/3           | Proteobacteria (Epsilon class) | Arc.peg.2312                                                         | [NiFe] Group 1b                                                          | [NiFe] Group 1b                                                          | Chemolithoautotrophic growth by anaerobic H <sub>2</sub> oxidation                                                    | Confirmed experimentally <sup>47</sup>                                           |
| <i>Methanoperedens nitroreducens</i>   | Euryarchaeota (ANME)           | WP_048088262.1<br>WP_048090768.1                                     | [NiFe] Group 3b<br>[NiFe] Group 3b                                       | [NiFe] Group 3b<br>[NiFe] Group 3b                                       | Secondary role for H <sub>2</sub> metabolism limited to fermentative evolution of H <sub>2</sub>                      | Unconfirmed but consistent with metagenome-based models <sup>35</sup>            |
| <i>Kryptonium thompsoni</i>            | Kryptonita                     | CUU03002.1<br>CUU06124.1                                             | [NiFe] Group 1d<br>[NiFe] Group 3b                                       | [NiFe] Group 1d<br>[NiFe] Group 3b                                       | Chemolithoautotrophic growth by aerobic H <sub>2</sub> oxidation, fermentative evolution of H <sub>2</sub> .          | Untested, candidate phylum identified by metagenomics <sup>39</sup>              |
| <i>Lokiarchaeum</i> sp. GC14_75        | Lokiarchaeota                  | KKK40681.1                                                           | [NiFe] Group 3c                                                          | [NiFe] Group 3c                                                          | Bifurcates electrons between H <sub>2</sub> , heterodisulfide, and ferredoxin                                         | Unconfirmed but consistent with metagenome-based models <sup>48</sup>            |
| <i>Nitrospira moscoviensis</i>         | Nitrospirae                    | WP_053379275.1                                                       | [NiFe] Group 2a                                                          | [NiFe] Group 2a                                                          | Chemolithoautotrophic growth by aerobic H <sub>2</sub> oxidation                                                      | Confirmed experimentally <sup>33</sup>                                           |
| <i>Bacterium</i> GW2011_GWE1_35_17     | Moranbacteria                  | KKQ46070.1<br>KKQ45273.1                                             | [NiFe] Group 1a<br>[NiFe] Group 3b                                       | [NiFe] Group 1a<br>[NiFe] Group 3b                                       | Chemolithoautotrophic growth by anaerobic H <sub>2</sub> oxidation, fermentative evolution of H <sub>2</sub> .        | Unconfirmed but consistent with metagenome-based models <sup>37</sup>            |
| <i>Bacterium</i> GW2011_GWA2_33_10     | Peregrinibacteria              | KKP36897.1                                                           | [FeFe] Group A3                                                          | [FeFe] Group A                                                           | Bifurcates electrons between H <sub>2</sub> , NADH, and ferredoxin                                                    | Unconfirmed but consistent with metagenome-based models <sup>37</sup>            |
| <i>Entotheonella</i> sp. TSY1          | Tectomicrobia                  | ETW97737.1<br>ETW94065.1                                             | [NiFe] Group 1h<br>[NiFe] Group 3b                                       | [NiFe] Group 1h<br>[NiFe] Group 3b                                       | Persistence by aerobic respiration of atmospheric H <sub>2</sub> , fermentative evolution of H <sub>2</sub>           | Untested, candidate phylum identified by metagenomics <sup>40</sup>              |

432 **Supporting Information**

433 **Figure S1.** Sequence similarity networks showing the relationships between closely  
434 related subgroups of [NiFe]-hydrogenases as narrow  $\log E$  filters.

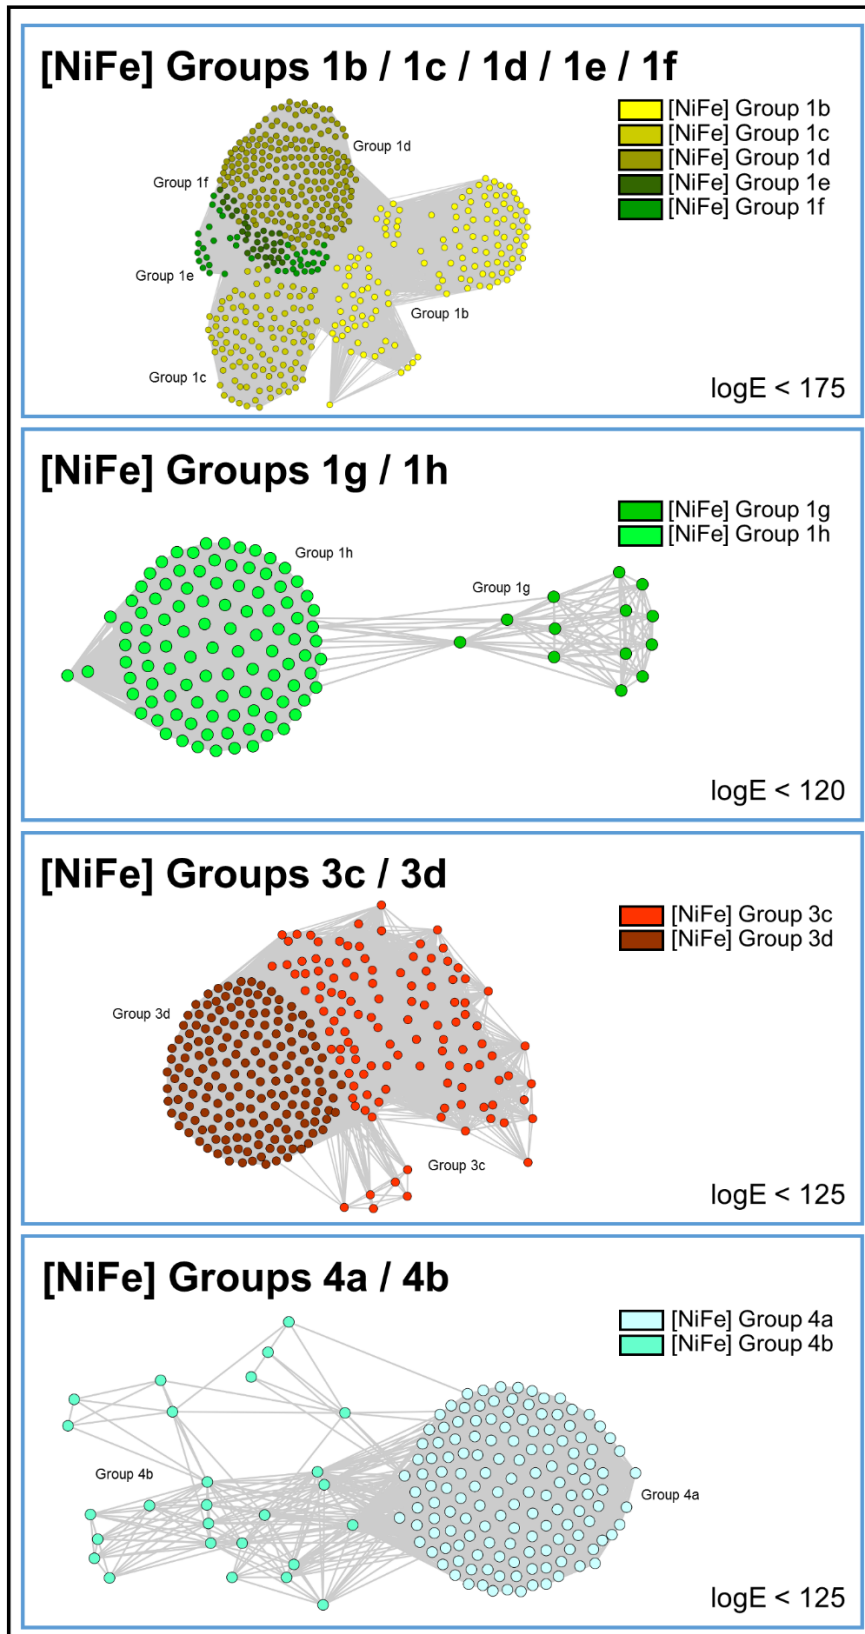

435

**Figure S2.** Screenshot showing interface of HydDB classification page.

HydDB Classify Browse Information Pages

## Classify

HydDB provides access to an accurate classifier for hydrogenase sequences and a curated database of hydrogenases by known type. The service is provided by the School of Biological Sciences, Monash University and the Bioinformatics Research Centre, Aarhus University.

### Classify

**Sequences**

**Sequences File**

No file chosen

Check sequences using CDD?  
If enabled, HydDB will use CDD to check whether the submitted sequences encode catalytic subunits of putative before classification. Since this step is time-consuming, you may want to uncheck this option if you are certain your sequences encode hydrogenase catalytic subunits.

**Mail**

If an e-mail address is provided, a mail will be sent when the job succeeds or fails.

### Instructions

To use the classifier to predict the type of one or more hydrogenases from sequence, either:

- paste your FASTA-formatted protein sequences into the text area, or
- upload a FASTA-formatted file with your protein sequences.

Press the "Submit" button to upload the sequences and begin the classification.

If you provided an e-mail address you will receive an e-mail when your job finishes or fails including a link to the results. You will also be able to download the results as a CSV file.

Only sequences encoding the catalytic subunits of hydrogenases will be classified, i.e. those binding the [NiFe]-centre (NiFe-hydrogenases), [FeFe]-centre (FeFe-hydrogenases), or [Fe]-centre (Fe-hydrogenases). Electron-transfer subunits, accessory proteins, and maturation factors cannot be classified by this service.

### Limits

A job can at most run for 2 hours. This should be enough for about 2500 sequences to be classified. Results will be stored for 2 weeks. However, we recommend to download the results as they may be deleted due to the rare event of a power outage or server crash.

### Statistics

|                                           |     |
|-------------------------------------------|-----|
| Jobs completed in total                   | 40  |
| Sequences classified in total             | 232 |
| Jobs completed in the last 24 hours       | 0   |
| Sequences classified in the last 24 hours | 0   |

**Figure S3.** Screenshot showing the information provided in the data entry pages for 3248 individual hydrogenases in HydDB.

HydDB
Classify
Browse
Information Pages ▾

  

## Entry WP\_004030875.1

|                                |                             |
|--------------------------------|-----------------------------|
| Phylum                         | Euryarchaeota               |
| Order                          | Methanobacteriales          |
| Organism                       | Methanobacterium formicicum |
| Hydrogenase                    | <a href="#">[Fe]</a>        |
| Activity (Predicted)           | Bidirectional               |
| Oxygen Tolerance (Predicted)   | Tolerant                    |
| Subunits (Predicted)           | 1                           |
| Metal Centres (Predicted)      | Fe ion                      |
| Accessory Subunits (Predicted) | None                        |

```

MKLAILGAGCYRTHAASGITNFSRACEVAEQVGKPEIAMTHSTIAMGAEKELAGIDEIVVSDPVFDNDFTVIDDFEYEAVIEAHKDPESIMPQIREKVNVAKDLKPKPPKG
AIHFTHPEDLGFVETTTDDNEAVQDADWMTWFPKGMQMGIIKEFADNLKEGAILTHACTVPTTFQKIFEDLSSDEMNIAPKVNVSYPHGAVPEMKGGVYIAEGYASEDAI
CKLVDWGVAAARGDAFKLPAELLPVCDMCSALTAITYAGILSYRDSVMNIIILGAPAGFAQWIAKESLTQVTDLMNSVGDHMEKLDPGALLGTADSMNFGAAADVLPVLEVL
ENRKGKGP TCNI
                    
```



**Figure S4.** Screenshot showing the capacity for browsing hydrogenase data entries in HydDB.

| NCBI Accession | Organism                               | Hydrogenase Class | Phylum        | Order              | Activity (Predicted) | Oxygen Tolerance (Predicted) | Subunits (Predicted) | Metal Centres (Predicted) | Accessory Subunits (Predicted) |
|----------------|----------------------------------------|-------------------|---------------|--------------------|----------------------|------------------------------|----------------------|---------------------------|--------------------------------|
| WP_004030875.1 | Methanobacterium formicum              | [Fe]              | Euryarchaeota | Methanobacteriales | Bidirectional        | Tolerant                     | 1                    | Fe ion                    | None                           |
| WP_012955328.1 | Methanobrevibacter ruminantium         | [Fe]              | Euryarchaeota | Methanobacteriales | Bidirectional        | Tolerant                     | 1                    | Fe ion                    | None                           |
| WP_019263574.1 | Methanobrevibacter smithii             | [Fe]              | Euryarchaeota | Methanobacteriales | Bidirectional        | Tolerant                     | 1                    | Fe ion                    | None                           |
| WP_016357634.1 | Methanobrevibacter sp. AbM4            | [Fe]              | Euryarchaeota | Methanobacteriales | Bidirectional        | Tolerant                     | 1                    | Fe ion                    | None                           |
| WP_013296316.1 | Methanothermobacter marburgensis       | [Fe]              | Euryarchaeota | Methanobacteriales | Bidirectional        | Tolerant                     | 1                    | Fe ion                    | None                           |
| WP_010876766.1 | Methanothermobacter thermautotrophicus | [Fe]              | Euryarchaeota | Methanobacteriales | Bidirectional        | Tolerant                     | 1                    | Fe ion                    | None                           |
| WP_013413799.1 | Methanothermus fervidus                | [Fe]              | Euryarchaeota | Methanobacteriales | Bidirectional        | Tolerant                     | 1                    | Fe ion                    | None                           |

**Figure S5.** Screenshot showing the detailed content of the information pages about each hydrogenase class on HydDB. Equivalent information pages are available for all 38 hydrogenase classes defined in this work (**Table 1**).

## [NiFe] Group 1h-hydrogenase

This entry was last updated at: June 13, 2016, 11:11 a.m.

|                  |                                                                                                                                                                                                                                        |
|------------------|----------------------------------------------------------------------------------------------------------------------------------------------------------------------------------------------------------------------------------------|
| Properties       |                                                                                                                                                                                                                                        |
| Group            | [NiFe] Group 1: Respiratory H <sub>2</sub> -uptake [NiFe] hydrogenases                                                                                                                                                                 |
| Subgroup         | [NiFe] Group 1h: Actinobacteria-type                                                                                                                                                                                                   |
| Function         | Hydrogenotrophic respiration using O <sub>2</sub> as terminal electron acceptor. Enzyme scavenges electrons from atmospheric H <sub>2</sub> to fuel respiratory chain during carbon-starvation. Route of electron transfer unresolved. |
| Activity         | H <sub>2</sub> -uptake (unidirectional, high-affinity)                                                                                                                                                                                 |
| Oxygen tolerance | O <sub>2</sub> -tolerant or O <sub>2</sub> -insensitive                                                                                                                                                                                |
| Localisation     | Membrane-associated?                                                                                                                                                                                                                   |

|                        |                                                                                                              |
|------------------------|--------------------------------------------------------------------------------------------------------------|
| Distribution           |                                                                                                              |
| Ecosystem distribution | Upland soils, plant tissues, possibly surface waters                                                         |
| Taxonomic distribution | Widespread among obligately aerobic soil bacteria, especially Actinobacteria, Acidobacteria, and Chloroflexi |

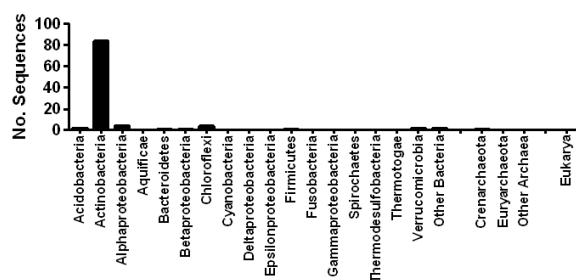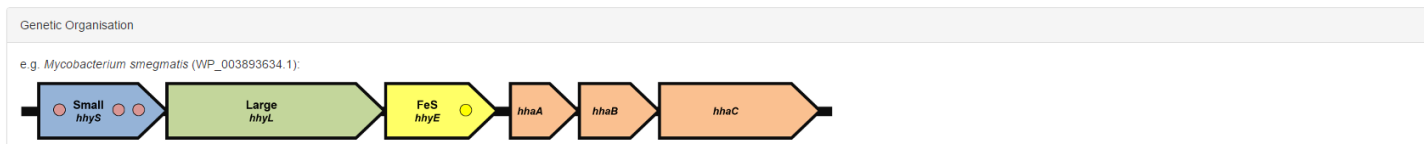

|                     |                                                                                                                                                       |
|---------------------|-------------------------------------------------------------------------------------------------------------------------------------------------------|
| Architecture        |                                                                                                                                                       |
| Structures          | 5AAS ( <i>Ralstonia eutropha</i> , 2.5 Å resolution, active)                                                                                          |
| Subunits            | 3?                                                                                                                                                    |
| Subunit description | HhyL (hydrogenase large subunit)<br>HhyS (hydrogenase small subunit) HhyE (putative iron-sulfur protein and proposed physiological electron acceptor) |
| Catalytic site      | [NiFe]-centre                                                                                                                                         |
| FeS clusters        | Proximal: 3Cys1Asp[4Fe4S]<br>Medial: 4Cys[4Fe4S]<br>Distal: 3Cys1His[4Fe4S]                                                                           |

**Important Notes**

The *Robiginitalea biformata* and *Sulfolobus islandicus* enzymes are relatively to distantly related to the main group. No studies have yet tested whether these enzymes have a H<sub>2</sub>-scavenging role like other Group 1h [NiFe]-hydrogenases. They may instead represent founding members of a functionally-distinct lineage.

| NCBI Accession                 | Organism                                        | Hydrogenase Class | Phylum         | Order            | Activity (Predicted) | Oxygen Tolerance (Predicted) | Subunits (Predicted) | Metal Centres (Predicted)           | Accessory Subunits (Predicted) |
|--------------------------------|-------------------------------------------------|-------------------|----------------|------------------|----------------------|------------------------------|----------------------|-------------------------------------|--------------------------------|
| <a href="#">WP_014267363.1</a> | <a href="#">Granulicella mallensis</a>          | [NiFe] Group 1h   | Acidobacteria  | Acidobacteriales | Aerobic Uptake       | Tolerant                     | 3                    | [NiFe]-centre, 3 x [4Fe4S] clusters | [FeS] protein                  |
| <a href="#">WP_011688202.1</a> | <a href="#">Soilbacter usitatus</a>             | [NiFe] Group 1h   | Acidobacteria  | Solibacterales   | Aerobic Uptake       | Tolerant                     | 3                    | [NiFe]-centre, 3 x [4Fe4S] clusters | [FeS] protein                  |
| <a href="#">WP_021597135.1</a> | <a href="#">Actinomadura madurae</a>            | [NiFe] Group 1h   | Actinobacteria | Actinomycetales  | Aerobic Uptake       | Tolerant                     | 3                    | [NiFe]-centre, 3 x [4Fe4S] clusters | [FeS] protein                  |
| <a href="#">WP_026402909.1</a> | <a href="#">Actinomadura rifamycinii</a>        | [NiFe] Group 1h   | Actinobacteria | Actinomycetales  | Aerobic Uptake       | Tolerant                     | 3                    | [NiFe]-centre, 3 x [4Fe4S] clusters | [FeS] protein                  |
| <a href="#">WP_018330638.1</a> | <a href="#">Actinomycetospira changmaiensis</a> | [NiFe] Group 1h   | Actinobacteria | Actinomycetales  | Aerobic Uptake       | Tolerant                     | 3                    | [NiFe]-centre, 3 x [4Fe4S] clusters | [FeS] protein                  |
| <a href="#">WP_007735075.1</a> | <a href="#">Rhodococcus qingshengii</a>         | [NiFe] Group 1h   | Actinobacteria | Actinomycetales  | Aerobic Uptake       | Tolerant                     | 3                    | [NiFe]-centre, 3 x [4Fe4S] clusters | [FeS] protein                  |
| <a href="#">WP_003935326.1</a> | <a href="#">Rhodococcus ruber</a>               | [NiFe] Group 1h   | Actinobacteria | Actinomycetales  | Aerobic Uptake       | Tolerant                     | 3                    | [NiFe]-centre, 3 x [4Fe4S] clusters | [FeS] protein                  |
| <a href="#">WP_005443931.1</a> | <a href="#">Saccharomonospora azurea</a>        | [NiFe] Group 1h   | Actinobacteria | Actinomycetales  | Aerobic Uptake       | Tolerant                     | 3                    | [NiFe]-centre, 3 x [4Fe4S] clusters | [FeS] protein                  |

« 1 2 3 »

## Literature

### Genetics:

- Berney, M., Greening, C., Hards, K., Collins, D., and Cook, G.M. (2014) Three different [NiFe] hydrogenases confer metabolic flexibility in the obligate aerobic *Mycobacterium smegmatis*. *Environ. Microbiol.* **16**: 318-330.
- Constant, P., Chowdhury, S.P., Hesse, L., and Conrad, R. (2011) Co-localization of atmospheric H<sub>2</sub> oxidation activity and high affinity H<sub>2</sub>-oxidizing bacteria in non-axenic soil and sterile soil amended with *Streptomyces* sp. PCB7. *Soil Biol. Biochem.* **43**: 1888-1893.
- Constant, P., Chowdhury, S.P., Hesse, L., Pratscher, J., and Conrad, R. (2011) Genome data mining and soil survey for the novel group 5 [NiFe]-hydrogenase to explore the diversity and ecological importance of presumptive high-affinity H<sub>2</sub>-oxidizing bacteria. *Appl. Environ. Microbiol.* **77**: 6027-6035.
- Greening, C., Bliswas, A., Carere, C.R., Jackson, C.J., Taylor, M.C., Stott, M.B., Cook, G.M., and Morales, S.E. (2016) Genomic and metagenomic surveys of hydrogenase distribution indicate H<sub>2</sub> is a widely utilised energy source for microbial growth and survival. *ISME J.* **10**: 761-777.
- Khdir, M., Hesse, L., Popa, M.E., Quiza, L., Lalonde, I., Meredith, L.K., Röckmann, T., and Constant, P. (2015) Soil carbon content and relative abundance of high affinity H<sub>2</sub>-oxidizing bacteria predict atmospheric H<sub>2</sub> soil uptake activity better than soil microbial community composition. *Soil Biol. Biochem.* **85**: 1-9.

### Physiology:

- Berney, M., Greening, C., Conrad, R., Jacobs, W.R., and Cook, G.M. (2014) An obligately aerobic soil bacterium activates fermentative hydrogen production to survive reductive stress during hypoxia. *Proc. Natl. Acad. Sci. U. S. A.* **111**: 11479-11484.
- Constant, P., Chowdhury, S.P., Pratscher, J., and Conrad, R. (2010) Streptomycetes contributing to atmospheric molecular hydrogen soil uptake are widespread and encode a putative high-affinity [NiFe]-hydrogenase. *Environ. Microbiol.* **12**: 821-829.

**Table S1.** Validation that HydDB classifies only hydrogenase catalytic subunit sequences. HydDB excludes non-hydrogenase sequences through a combination of homology checks (sequences are only classified as hydrogenases if BLAST *E*-value of the closest hit in HydDB is less than  $10^{-5}$ ) and CDD checks (sequences are only classified as hydrogenases if signature conserved domains are found). In addition, the classifier has been specifically trained to exclude four protein families that are homologous to hydrogenase catalytic subunits (HmdII, Her, NuoD, NARF) but lack hydrogenase activity.

| NCBI Accession | Sequence type                              | Homology check                                         | CDD check                                   | Final result    |
|----------------|--------------------------------------------|--------------------------------------------------------|---------------------------------------------|-----------------|
| WP_041979300.1 | Validated hydrogenase catalytic subunit    | Highest sequence homology with [NiFe] Group 1h (E = 0) | Ni,Fe-hydrogenase I large subunit (COG0374) | Hydrogenase     |
| WP_011729412.1 | P-type ATPase (unrelated to hydrogenases)  | Low sequence homology with hydrogenases (E = 5.6)      | Non-hydrogenase                             | Non-hydrogenase |
| WP_003895387.1 | Chaperone (unrelated to hydrogenases)      | Low sequence homology with hydrogenases (E = 3.8)      | Non-hydrogenase                             | Non-hydrogenase |
| WP_013295714.1 | HmdII (homologous with [Fe]-hydrogenases)  | Highest sequence homology with HmdII (E = 0)           | HMD (pfam03201)                             | Non-hydrogenase |
| WP_003901794.1 | Ehr (homologous with [NiFe]-hydrogenases)  | Highest sequence homology with Ehr (E = 0)             | Complex1_49kDa superfamily (cl21493)        | Non-hydrogenase |
| WP_003901553.1 | NuoD (homologous with [NiFe]-hydrogenases) | Highest sequence homology with NuoD (E = 0)            | NuoD (COG0649)                              | Non-hydrogenase |
| NP_114174.1    | NARF (homologous with [FeFe]-hydrogenases) | Highest sequence homology with NARF (E = 0)            | Fe_hyd_Ig_C (pfam02906)                     | Non-hydrogenase |

**Table S2.** Hydrogenase sequences where there is disagreement between classification by SSN and *k*-NN methods. These sequences represent six out of the total 3248 sequences analyzed, i.e. 0.0018%.

| <b>NCBI Accession</b> | <b>Organism</b>                | <b><i>k</i>-NN Classification</b> | <b>SSN Classification</b> |
|-----------------------|--------------------------------|-----------------------------------|---------------------------|
| WP_027414715.1        | Aneurinibacillus terranovensis | [NiFe] Group 1e                   | [NiFe] Group 1d           |
| WP_027358538.1        | Desulforegula conservatrix     | [NiFe] Group 3d                   | [NiFe] Group 3c           |
| WP_012532312.1        | Geobacter bemidjiensis         | [NiFe] Group 3d                   | [NiFe] Group 3c           |
| WP_012469611.1        | Geobacter lovleyi              | [NiFe] Group 3d                   | [NiFe] Group 3c           |
| WP_004512544.1        | Geobacter metallireducens      | [NiFe] Group 3d                   | [NiFe] Group 3c           |
| WP_015839165.1        | Geobacter sp. M21              | [NiFe] Group 3d                   | [NiFe] Group 3c           |

**Dataset S1.** Excel spreadsheet listing the sequence, taxonomy, and hydrogenase class of all 3248 hydrogenase catalytic subunit sequences listed in HydDB.

**Dataset S2.** Zip file containing the Cytoscape network for [NiFe]-hydrogenases.

**Dataset S3.** Zip file containing the Cytoscape network for [FeFe]-hydrogenases.

**Dataset S4.** Zip file containing the Cytoscape network for [Fe]-hydrogenases.
